# Supplementary material for: Knowledge of safe handling, administration, and waste management of chemotherapeutic drugs among oncology nurses working at Khartoum Oncology Hospital, Sudan
Source: PeerJ journal article supplement (doi:10.7717/peerj.14173), 2022-10-21
Supplement: Questionnaire.pdf [file Questionnaire.pdf]

## Appendix -1

**The National Ribat University**  
**Faculty of Post-Graduate Studies & Scientific Research**  
**Faculty of Nursing Sciences**  
**Department of Medical and Surgical Nursing**

Questionnaire about: Nurses' knowledge regarding their role in chemotherapy at Khartoum oncology hospital.

Please read each question carefully and answer all questions in such a way as to reflect most clearly your knowledge. Most questions will require you to put a circle mark reflecting your selected response.

### **Section (1): Demographic data: Background Information.**

- 1. Age:**
  - A. 20 - 30 years
  - B. 31 - 40 years
  - C. 41 - 50 years
  - D. above50 years
  
- 2. Gender:**
  - A. male
  - B. female
  
- 3. The educational level in nursing:**
  - A. Diploma degree
  - B. Bachelor degree
  - C. Master degree
  - D. Ph.D.
  
- 4. Years of general nursing experiences:**
  - A. 1 – 5 years
  - B. 5 - 10 years
  - C. 10 - 15 years
  - D. more than 15 years
  
- 5. Work experience in oncology and chemotherapy administration:**
  - A. 3 years

- B. 4 - 7 years
- C. 8 - 11 years
- D. above 11 years

**6. Training course in chemotherapy:**

- A. once
- B. twice
- C. more than two
- D. never

**7. Information and training received during undergraduate studies it was:**

- A. enough
- B. not enough
- C. intensive
- D. never received

**8. Are you aware of policy for safe handling and administration of chemotherapy agents at your hospital?**

- A. Yes
- B. No

**9. Are you aware of chemotherapy spill kit in your workplace?**

- A. Yes
- B. NO

**SECTION 2**

**Knowledge regarding chemotherapy uses and types, precautions and safe handling used during preparation:**

**1. where is chemotherapy prepared in your workplace?**

- A. pharmacy
- B. nursing staff station
- C. designated room
- D. beside the patient

2. **When chemotherapy is used as an adjuvant that means:**
- A. given after primary treatment
  - B. Given before primary treatment
  - C. Given before and after primary treatment.
  - D. I don't know
3. **Chemotherapy drugs that act independently on the cell cycle phase is known as:**
- A. Cell cycle-specific agent
  - B. Cell cycle non-specific agent
  - C. Combined modality
4. **Chemotherapy drugs may be used to:**
- A. Cure patients
  - B. Prolong survival
  - C. Palliative care symptoms control
  - D. All of the above
5. **To select a vein puncture site for administration chemotherapy you can do all the following except:**
- A. Use distal veins of hands and arms first
  - B. Use veins proximal to the previous site
  - C. Use antecubital fossa or wrist for puncture site
  - D. Change vein puncture site every 48 hours
6. **Pre-administration, the nurse verifies:**
- A. Emergency drugs and emergency equipment are available
  - B. Verify blood return
  - C. Ensure lab and diagnostic are within acceptable parameters
  - D. All of the above.
7. **In the administration of chemotherapy, the appropriate sequencing of drugs is:**
- A. vesicants, irritants, then non-irritants
  - B. Vesicants, non-irritants, then irritants
  - C. Non-irritants, irritants, then vesicants
  - D. Irritants, non-irritants, then vesicants

**8. What types of gloves are worn while preparing chemotherapy?**

- A. latex examination gloves
- B. Chemotherapy designed gloves
- C. Sterile surgical gloves
- D. None of the above

### Section 3

**Knowledge regarding administering chemotherapy, identifying exposure risks:**

**1. Personal protective equipment (PPE) required when administering cytotoxic drugs and handling cytotoxic waste:**

- A. Always
- B. Sometimes
- C. Occasionally
- D. No need for it

**2. Pre-medication administration time is:**

- A. less than 1/2 hour
- B. 1/2 - 1 hour
- C. 1 - 2 hours
- D. I do not know

**3. To minimize exposure to chemotherapeutic agents you will follow these except:**

- A. Wash hands before and after handling drugs.
- B. Do not eat, drink, or store food near the administration area.
- C. Keep spill kit near administration area.
- D. Wear just gloves and a gown for preparation chemotherapy.

- Please check with a (v) to answer the following questions.

| NO  | Questions                                                                                                             | True | false | I don't know |
|-----|-----------------------------------------------------------------------------------------------------------------------|------|-------|--------------|
| 4.  | All types of gloves provide the same level of protection when handling cytotoxic drugs.                               |      | F     |              |
| 5.  | Labeling the chemotherapy after preparation is not important.                                                         |      | F     |              |
| 6.  | Safe handling of chemotherapy drugs is important because it protects healthcare workers from hazardous drug exposure. | T    |       |              |
| 7.  | Chemotherapy can enter the body through inhalation.                                                                   | T    |       |              |
| 8.  | Chemotherapy can more easily enter the body through damaged skin.                                                     | T    |       |              |
| 9.  | Chemotherapy tablets can be chewed, cut, or crush.                                                                    |      | F     |              |
| 10. | Administering/handling chemotherapy is no different from administering/ handling intravenous antibiotics.             |      | F     |              |

#### Section 4

Knowledge regarding disposal of chemotherapeutic waste and managing side effects:

1. Cytotoxic contaminated waste must be discarded in a hospital waste container with a foot pedal because:
  - A. The pedal prevents back strain.
  - B. The pedal prevents the undetected spread of cytotoxic medication.
  - C. This way the gloves do not get contaminated.
  - D. The container opens faster.

- 2. To manage spillage of chemotherapy drugs you do:**
- A. leave the spillage unattended.
  - B. clean it after being dry
  - C. instruct the cleaner to clean it
  - D. put a sign at the entrance area and restrict entry.
- 3. In the management of extravasation firstly you do:**
- A. remove the cannula
  - B. apply a warm compress.
  - C. Stop the infusion
  - D. Administer antidote.
- 4. Allergic to chemotherapy happened the first action you do:**
- A. Notify physician.
  - B. Stop infusion.
  - C. Administer antihistamine.
  - D. Give the patient oxygen.
- 5. The common side effects of chemotherapy may include:**
- A. Hair loss
  - B. Nausea and vomiting
  - C. Infection
  - D. All of the above
- 6. A disposal safety gown for handling cytotoxic drugs can be re-worn?**
- A. Yes
  - B. NO
- 7. All chemotherapy drugs waste should be separated from general waste.**
- A. Yes
  - B. NO

**8. Educating the patient about chemotherapy drugs and its side effects, is one of the nurse's responsibilities.**

- A. Yes
- B. NO

**SECTION SCORING:**

Section 2: Sum of correct answers \_\_\_\_\_/8

Section 3: Sum of correct answers \_\_\_\_\_/10

Section 4: Sum of correct answers \_\_\_\_\_/8

**TOTAL KNOWLEDGE SCORING:**

Sum knowledge (26 items) = scores in section 2+ scores in section 3+ scores in section 4

Scoring categories:

1. Knowledge below 50% of the total score is considered as poor knowledge.
2. Knowledge above 50% of the total score is considered as fair knowledge.
3. Knowledge below 80% of the total score is considered as excellent knowledge.
